# Supplementary material for: A hierarchical zeolitic Murray material with a mass transfer advantage promotes catalytic efficiency improvement
Source: Royal Society of Chemistry journal article supplement (doi:10.1039/c8qi00761f), 2018-01-01
Supplement: c8qi00761f1.pdf [file c8qi00761f1.pdf]

## Supporting Information

### Hierarchical Zeolitic Murray Material with Mass Transfer Advantage Promotes Catalytic Efficiency Improvement

Zhao Peng,<sup>a,b</sup> Li-Hua Chen,<sup>\*a</sup> Ming-Hui Sun,<sup>c</sup> Heng Zhao,<sup>a</sup> Zhao Wang,<sup>a</sup> Yu Li,<sup>a</sup> Li-Yuan Li,<sup>b</sup> Jian Zhou,<sup>\*b</sup>  
Zhi-Cheng Liu,<sup>b</sup> and Bao-Lian Su<sup>a,d,e</sup>

<sup>a</sup>Laboratory of Living Materials at the State Key Laboratory of Advanced Technology for Materials Synthesis and Processing, Wuhan University of Technology, 122 Luoshi Road, 430070, Wuhan, Hubei, China;

<sup>b</sup>Shanghai Research Institute of Petrochemical Technology, SINOPEC, Shanghai, 201208, P.R.China

<sup>c</sup>MOE Key Laboratory of Bioinorganic and Synthetic Chemistry, School of Chemistry, Sun Yat-sen University, Guangzhou 510275, P. R. China.

<sup>d</sup>Laboratory of Inorganic Materials Chemistry (CMI), University of Namur, 61 rue de Bruxelles, B-5000 Namur, Belgium;

<sup>e</sup>Clare Hall, University of Cambridge, Cambridge, CB2 1EW, UK

E-mails for corresponding author: [chenlihua@whut.edu.cn](mailto:chenlihua@whut.edu.cn), [zhouj.sshy@sinopec.com](mailto:zhouj.sshy@sinopec.com)

## Figures and Calculations

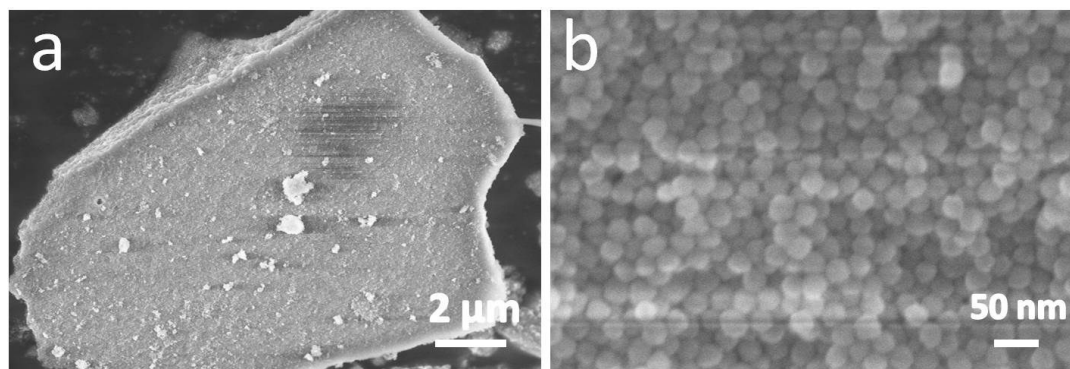

**Fig.S1 SEM images of amorphous silica with a monodisperse spherical shape.** The particle size distribution of silica sphere is among 25-30nm.

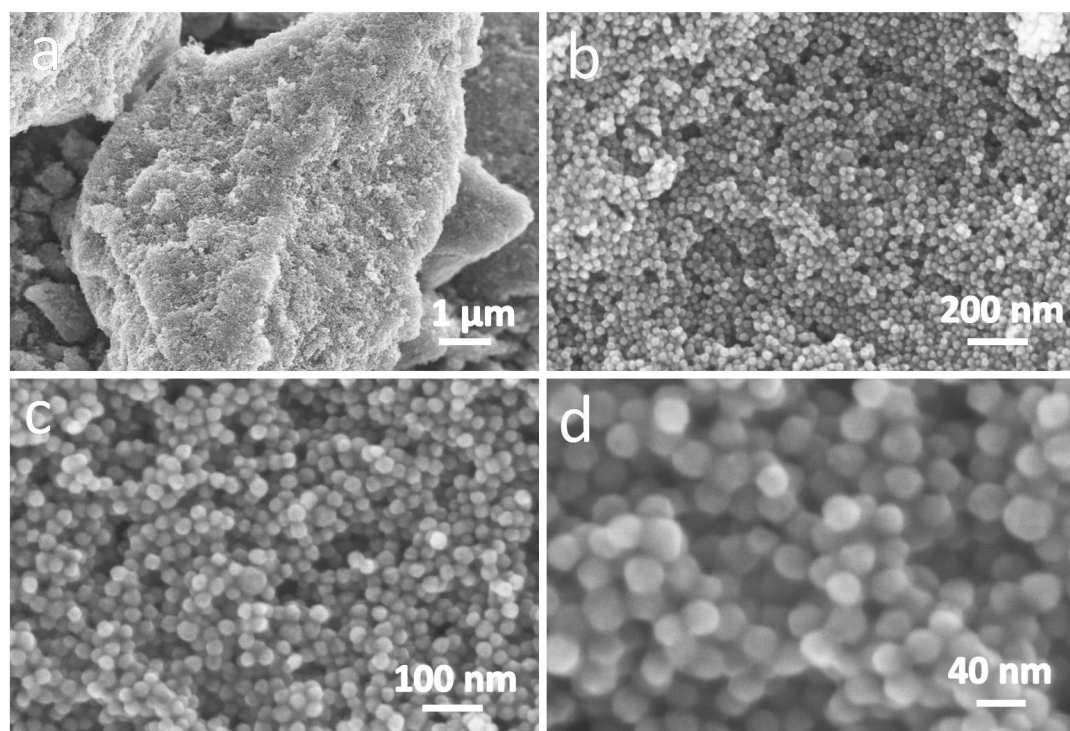

**Fig.S2 SEM images of SiO<sub>2</sub> NPs@porous carbon composites over different magnifications.** In our synthetic strategy, the appropriate amount of carbon source is extremely important, which could ensure that silicon oxide ball is well coated. As-prepared SiO<sub>2</sub> NPs@C still kept spherical shape with good dispersion. The spherical dimension of each monomer is approximately 35-40 nm.

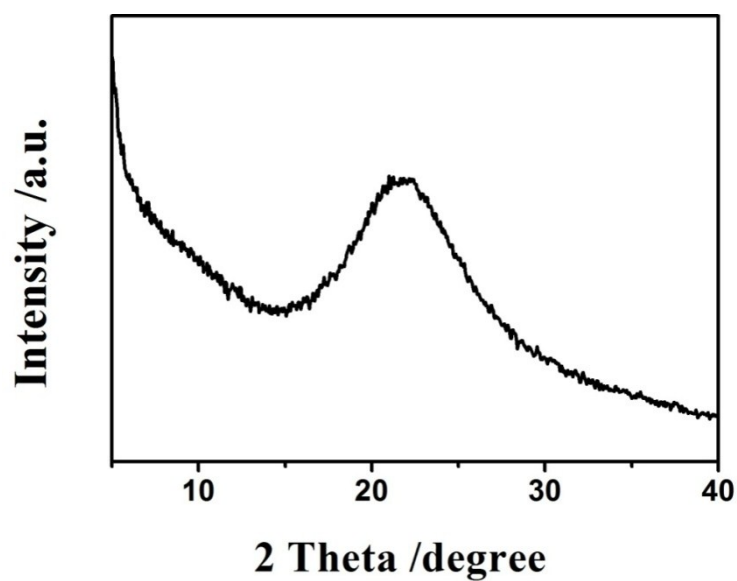

Fig.S3 XRD patterns of SiO<sub>2</sub> NPs@C composites. The sample is completely amorphous.

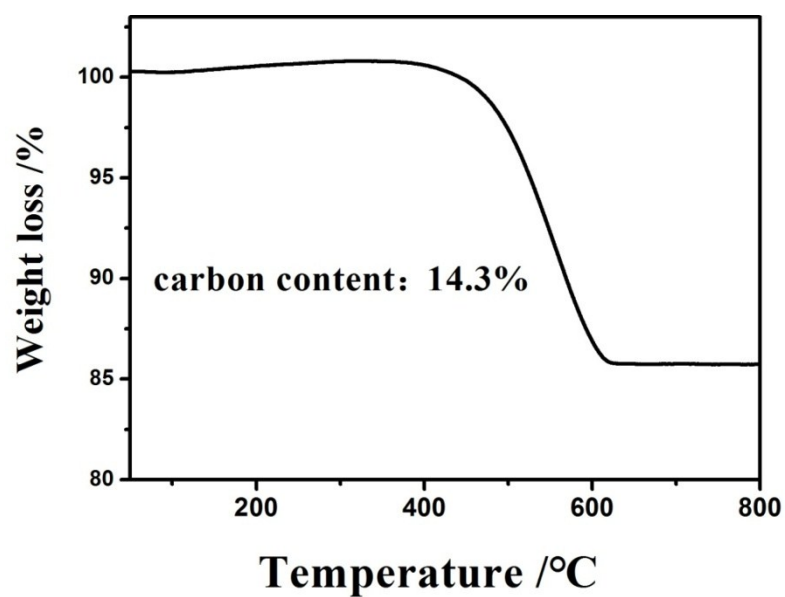

Fig.S4TGA curves of SiO<sub>2</sub> NPs@C composites. The carbon content of the composites is 14.3%.

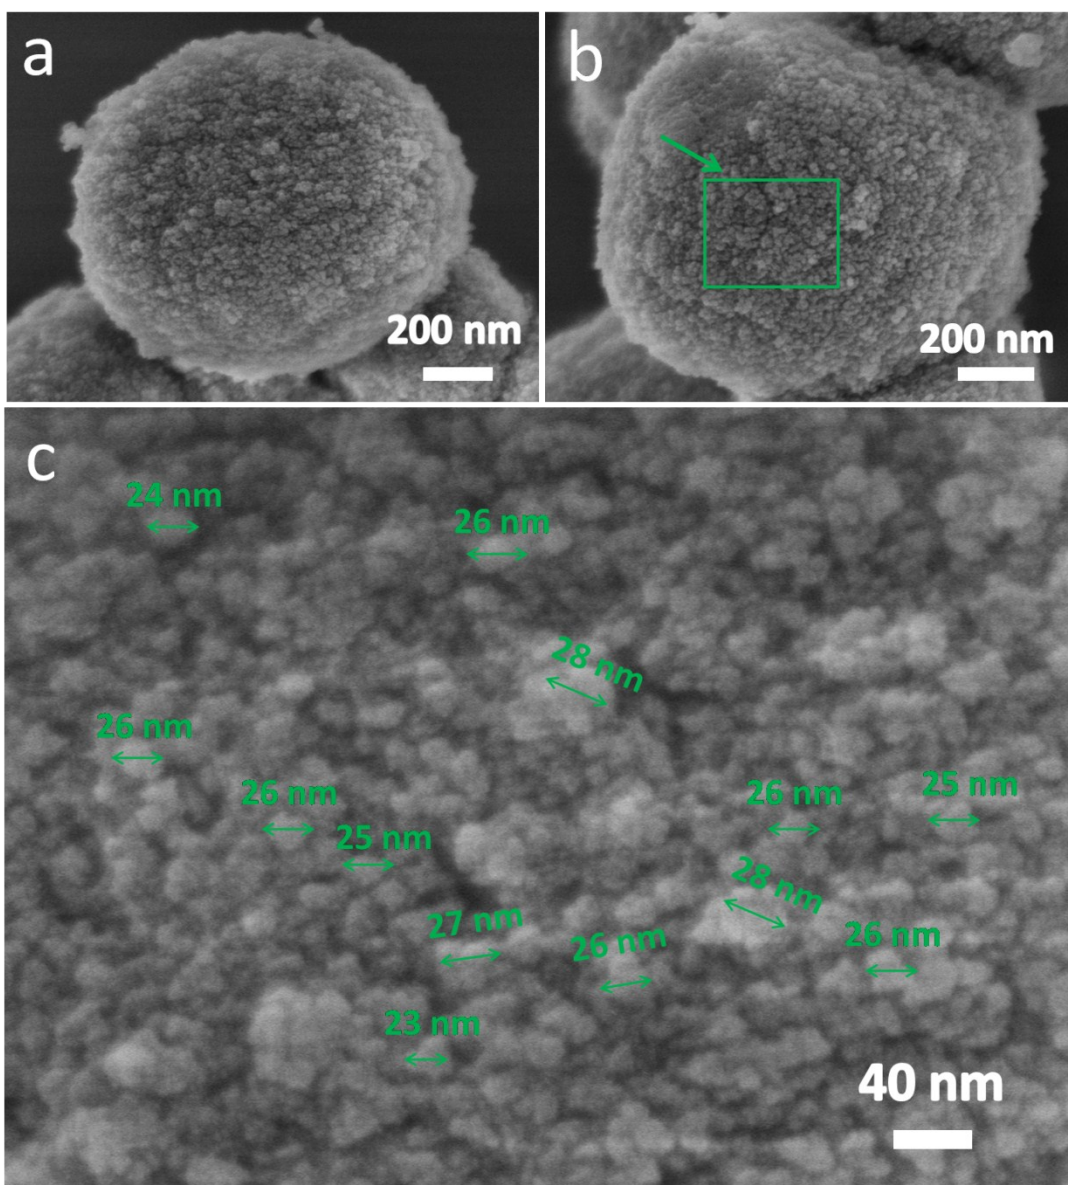

Fig.S5 SEM images of Hier-ZSM-5 under different magnifications.

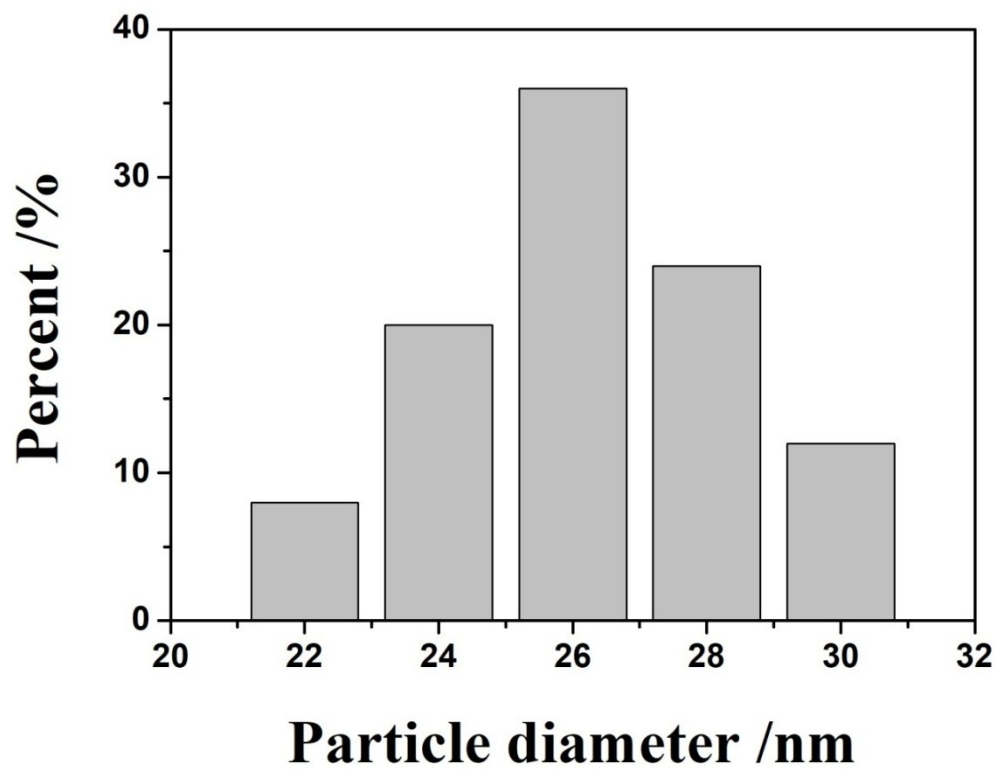

Fig.S6 Particle-size distributions of primary nanocrystalline units in Hier-ZSM-5. Histograms showed the percentage distribution of particle-sizes, and the average size is 26 nm.

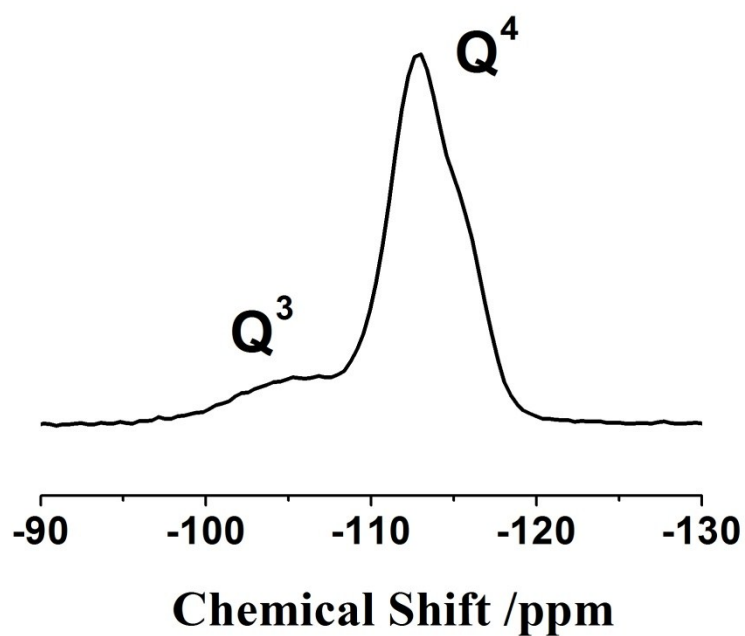

Fig.S7 $^{29}\text{Si}$  MAS NMR spectra of Hier-ZSM-5. Hier-ZSM-5 indicated a high degree of skeleton condensation.

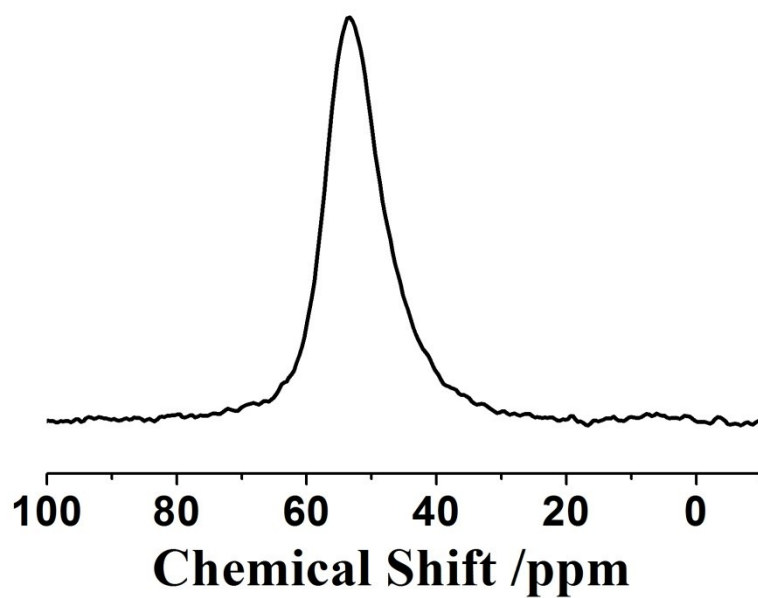

Fig.S8 $^{27}\text{Al}$  MAS NMR spectra of Hier-ZSM-5. The aluminum atom was almost completely introduced into a zeolitic skeleton.

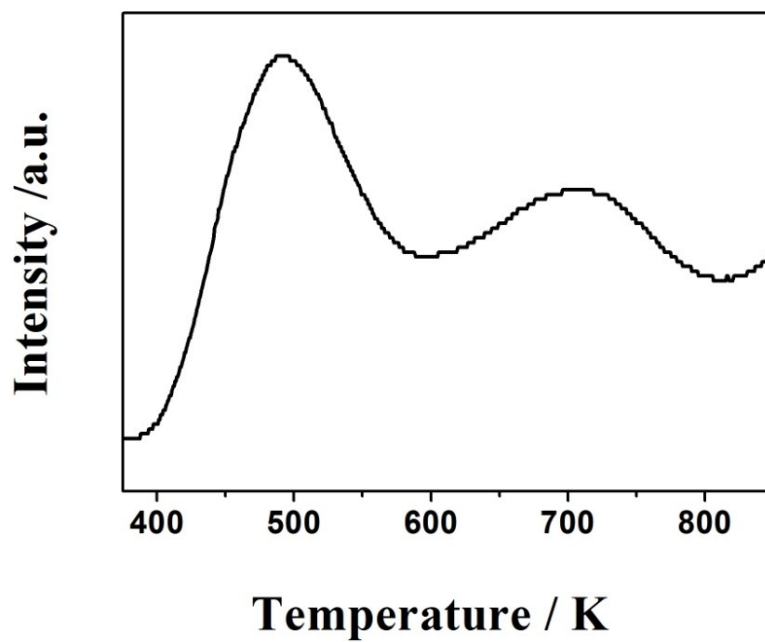

Fig.S9  $\text{NH}_3$ -TPD curve of Hier-ZSM-5.

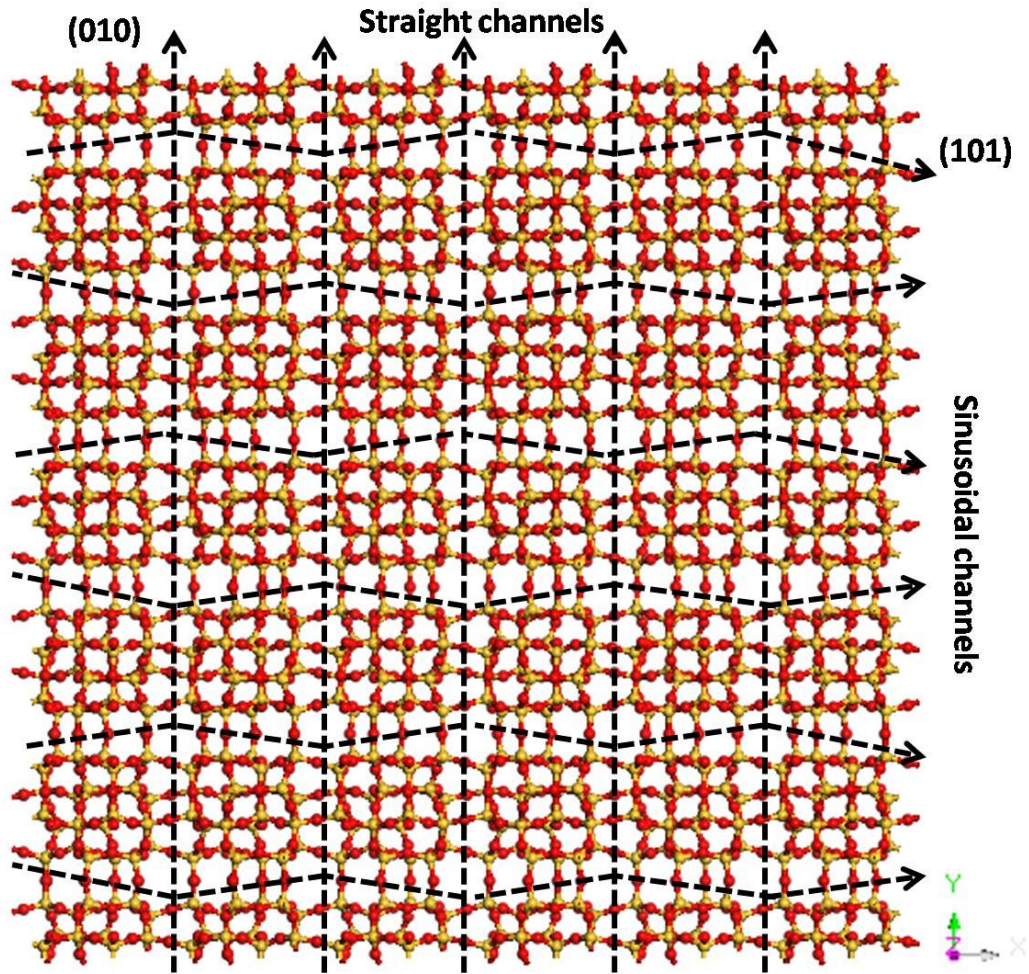

**Fig. S10 The basic skeleton diagram of MFI-type zeolite.** There are two kinds of channels, straight channels along b (010) axis, and sinusoidal channels along (101) axis. The density distribution for the number of straight channels along b (010) axis was 0.730 per square nanometer. And the density distribution for the number of sinusoidal channels along (101) axis was 0.612 per square nanometer. The micropore channel of MFI-type nanocrystalline with a diameter (i.e. **d**) was calculated as following formula, that is, the value of **n** in generalized Murray's law.

$$n = \frac{\pi d^2}{4} (0.730 + 0.612) \quad (1)$$

For Hier-ZSM-5, while **d** equals 26 nm, **n** gets 712.
